# Supplementary material for: Adding rituximab to chemotherapy for diffuse large B-cell lymphoma patients in Indonesia: a cost utility and budget impact analysis
Source: Springer Nature journal article supplement (doi:10.1186/s12913-022-07956-w), 2022-04-25
Supplement: MOESM2 [file 20341898]

## Costs (In Indonesia Rupiah)

### 1. Direct Medical Costs (from hospital billing) R-CHOP

|                                    |         | Progression Free |             |                 | Progressive |              |                 |
|------------------------------------|---------|------------------|-------------|-----------------|-------------|--------------|-----------------|
|                                    |         | Rituximab        | CHOP        | Hospitalization | Rituximab   | ICE*         | Hospitalization |
| <b>Direct Medical Costs R-CHOP</b> | Mean    | Rp10,594,889     | Rp1,065,551 | Rp5,667,423     | Rp8,533,550 | Rp4,066,422  | Rp8,163,358     |
|                                    | Min     | Rp1,529,000      | Rp160       | Rp109,440       | Rp1,477,400 | Rp1,621,603  | Rp2,103,391     |
|                                    | Max     | Rp57,419,876     | Rp4,467,584 | Rp33,010,258    | Rp9,494,416 | Rp14,652,275 | Rp21,274,138    |
|                                    | Median  | Rp9,523,405      | Rp810,800   | Rp4,548,646     | Rp9,174,000 | Rp2,024,781  | Rp6,958,634     |
|                                    | StDev   | Rp4,526,950      | Rp646,925   | Rp4,921,156     | Rp2,238,700 | Rp4,235,200  | Rp3,993,546     |
|                                    | StError | Rp250,725        | Rp36,108    | Rp270,491       | Rp674,994   | Rp1,058,800  | Rp998,386       |

In progressive states, CHOP costs assumed similar.

The use of ICE chemotherapy is very few (only 2 patients from 54 eligible patients), however we present the data to see difference compared to CHOP.

### 2. Direct Non-Medical Costs

|                                  |         | Progression Free | Progressive |
|----------------------------------|---------|------------------|-------------|
| <b>Direct Non- Medical Costs</b> | Mean    | Rp1,225,236      | Rp4,685,253 |
|                                  | Min     | Rp70,000         | Rp166,667   |
|                                  | Max     | Rp5,839,333      | Rp9,409,091 |
|                                  | Median  | Rp733,333        | Rp4,480,000 |
|                                  | StDev   | Rp1,441,131      | Rp4,624,629 |
|                                  | StError | Rp232,816        | Rp969,590   |

### 3. Indirect Cost

| By model states |         | Progression Free | Progressive |
|-----------------|---------|------------------|-------------|
| Indirect Costs  | Mean    | Rp 2,035,848     | Rp 538,636  |
|                 | Min     | Rp 33,333        | Rp 350,000  |
|                 | Max     | Rp 11,477,500    | Rp 727,273  |
|                 | Median  | Rp 1,000,000     | Rp 538,636  |
|                 | StDev   | Rp 2,877,552     | Rp 266,772  |
|                 | StError | Rp 713,596       | Rp 154,021  |
