# Supplementary material for: Adding rituximab to chemotherapy for diffuse large B-cell lymphoma patients in Indonesia: a cost utility and budget impact analysis
Source: Springer Nature journal article supplement (doi:10.1186/s12913-022-07956-w), 2022-04-25
Supplement: MOESM3 [file 20341898]

| Patient ID | Mobility | Self care | Usual activity | Pain | Anxiety | VAS | Value |       |
|------------|----------|-----------|----------------|------|---------|-----|-------|-------|
| P1         | 1        | 1         | 1              | 1    | 4       | 1   | 70    | 11141 |
| P2         | 1        | 1         | 1              | 3    | 2       | 1   | 80    | 11321 |
| P3         | 2        | 1         | 1              | 1    | 3       | 1   | 80    | 21131 |
| P4         | 1        | 1         | 1              | 1    | 2       | 1   | 60    | 11121 |
| P5         | 3        | 3         | 3              | 3    | 3       | 3   | 70    | 33333 |
| P6         | 2        | 1         | 1              | 1    | 1       | 1   | 80    | 21111 |
| P7         | 1        | 1         | 1              | 1    | 1       | 2   | 80    | 11112 |
| P8         | 1        | 1         | 1              | 1    | 1       | 3   | 75    | 11113 |
| P9         | 2        | 2         | 2              | 1    | 1       | 1   | 90    | 22111 |
| P10        | 3        | 1         | 1              | 3    | 1       | 2   | 65    | 31312 |
| P11        | 1        | 1         | 1              | 2    | 2       | 2   | 85    | 11222 |
| P12        | 1        | 2         | 2              | 2    | 2       | 2   | 80    | 12222 |
| P13        | 4        | 3         | 3              | 3    | 3       | 4   | 85    | 43334 |
| P14        | 2        | 2         | 2              | 2    | 2       | 3   | 80    | 22223 |
| P15        | 1        | 1         | 1              | 1    | 1       | 2   | 80    | 11112 |
| P16        | 2        | 2         | 2              | 2    | 2       | 2   | 87    | 22222 |
| P17        | 2        | 2         | 2              | 2    | 2       | 3   | 75    | 22223 |
| P18        | 1        | 1         | 1              | 1    | 1       | 2   | 95    | 11112 |
| P19        | 2        | 2         | 2              | 2    | 2       | 2   | 75    | 22222 |
| P20        | 2        | 2         | 2              | 3    | 2       | 5   | 60    | 22325 |
| P21        | 1        | 1         | 1              | 1    | 2       | 4   | 70    | 11124 |
| P22        | 1        | 1         | 1              | 1    | 1       | 2   | 75    | 11112 |
| P23        | 1        | 1         | 1              | 3    | 1       | 2   | 70    | 11312 |
| P24        | 2        | 1         | 1              | 3    | 2       | 1   | 60    | 21321 |
| P25        | 2        | 1         | 1              | 2    | 3       | 1   | 85    | 21231 |
| P26        | 1        | 1         | 1              | 3    | 2       | 1   | 80    | 11321 |
| P27        | 1        | 1         | 1              | 1    | 4       | 2   | 80    | 11142 |
| P28        | 1        | 1         | 1              | 2    | 4       | 1   | 80    | 11241 |
| P29        | 1        | 1         | 1              | 2    | 1       | 4   | 80    | 11214 |
| P30        | 1        | 1         | 1              | 2    | 3       | 1   | 75    | 11231 |
| P31        | 1        | 1         | 1              | 1    | 1       | 1   | 80    | 11111 |
| P32        | 1        | 1         | 1              | 1    | 3       | 1   | 70    | 11131 |
| P33        | 1        | 1         | 1              | 1    | 1       | 2   | 90    | 11112 |

|     |   |   |   |   |   |   |    |       |
|-----|---|---|---|---|---|---|----|-------|
| P34 | 1 | 1 | 1 | 1 | 1 | 1 | 90 | 11111 |
| P35 | 1 | 1 | 1 | 1 | 2 | 1 | 75 | 11121 |
| P36 | 1 | 1 | 1 | 1 | 1 | 1 | 70 | 11111 |
| P37 | 1 | 1 | 1 | 1 | 2 | 2 | 80 | 11122 |
| P38 | 1 | 1 | 1 | 1 | 2 | 1 | 65 | 11121 |
| P39 | 1 | 1 | 1 | 1 | 1 | 1 | 80 | 11111 |
| P40 | 1 | 1 | 1 | 1 | 2 | 1 | 65 | 11121 |
| P41 | 1 | 1 | 1 | 1 | 1 | 1 | 90 | 11111 |
| P42 | 3 | 1 | 2 | 3 | 2 | 3 | 30 | 31223 |
