# Supplementary material for: Adding rituximab to chemotherapy for diffuse large B-cell lymphoma patients in Indonesia: a cost utility and budget impact analysis
Source: Springer Nature journal article supplement (doi:10.1186/s12913-022-07956-w), 2022-04-25
Supplement: MOESM4 [file 20341898]

## Supplementary

Baseline Parameters showing transition probabilities from and to each health state

| Transitions (from, to)                      | R-CHOP | CHOP  | Distribution | Source         |
|---------------------------------------------|--------|-------|--------------|----------------|
| <i>Progression free to progression free</i> |        |       |              |                |
| Interval 1                                  | 0.629  | 0.420 | Beta         | GELA trial     |
| Interval 2                                  | 0.630  | 0.421 | Beta         | GELA trial     |
| Interval 3                                  | 0.630  | 0.421 | Beta         | GELA trial     |
| Interval 4                                  | 0.630  | 0.421 | Beta         | GELA trial     |
| Interval 5                                  | 0.629  | 0.420 | Beta         | GELA trial     |
| <i>Progression free to death</i>            |        |       |              |                |
| Interval 1                                  | 0.004  | 0.004 | Beta         | WHO life table |
| Interval 2                                  | 0.003  | 0.003 | Beta         | WHO life table |
| Interval 3                                  | 0.003  | 0.003 | Beta         | WHO life table |
| Interval 4                                  | 0.004  | 0.004 | Beta         | WHO life table |
| Interval 5                                  | 0.005  | 0.005 | Beta         | WHO life table |
| <i>Progressive to death</i>                 |        |       |              |                |
| Interval 1                                  | 0.001  | 0.004 | Beta         | GELA trial     |
| Interval 2                                  | 0.000  | 0.003 | Beta         | GELA trial     |
| Interval 3                                  | 0.000  | 0.001 | Beta         | GELA trial     |
| Interval 4                                  | 0.000  | 0.002 | Beta         | GELA trial     |
| Interval 5                                  | 0.001  | 0.003 | Beta         | GELA trial     |

Note: All transitional probabilities were adjusted per 3 weeks. In transition probability from progression free to progression free and from progression to death for RCHOP, the time interval 1 equals to 0-24 months, time interval 2 equals to 24-48 months, time interval 3 equals to 48-72 months, time interval 4 equals to 72-96 months, and time interval 5 equals to 96-120 months. In transition probability from progression free to progression free and progressive to death for CHOP, the time interval 1 equals to 0-6 months, time interval 2 equals to 6-12 months, time interval 3 equals to 12-18 months, time interval 4 equals to 12-18 months, and time interval 5 equals to 12-18 months. In

transition probability from progression free to progressive for both RCHOP and CHOP, the time interval 1 equals to year 1, time interval 2 equals to year 2, time interval 3 equals to year 3, time interval 4 equals to year 4, and time interval 5 equals to year 5.
